# Supplementary material for: Psychometric evaluation of the depression anxiety stress scale 8-items (DASS-8)/DASS-12/DASS-21 among family caregivers of patients with dementia
Source: Front Public Health. 2022 Oct 25;10:1012311. doi: 10.3389/fpubh.2022.1012311 (PMC9641276; doi:10.3389/fpubh.2022.1012311)
Supplement: Supplementary file 1 [file Data_Sheet_1.xlsx]

## Sheet: Bifactor structures
DASS-8
														Regression Weights: (Group number 1 - Default model)
																	Estimate	S.E.	C.R.	P	Label
														DASS9	<---	Anxiety	1
														DASS15	<---	Anxiety	0.851	0.056	15.126	***	par_2
														DASS20	<---	Anxiety	0.809	0.055	14.576	***	par_3
														DASS10	<---	Depression	1
														DASS13	<---	Depression	0.356	0.098	3.624	***	par_4
														DASS16	<---	Depression	1.141	0.13	8.781	***	par_5
														DASS8	<---	Stress	1
														DASS12	<---	Stress	0.394	0.12	3.296	***	par_9
														DASS10	<---	DASS8GeneralFactor	0.704	0.031	22.774	***	a
														DASS13	<---	DASS8GeneralFactor	0.704	0.031	22.774	***	a
Supplementary Figure 1. Bifactor structure of the DASS-8														DASS16	<---	DASS8GeneralFactor	0.704	0.031	22.774	***	a
														DASS9	<---	DASS8GeneralFactor	0.704	0.031	22.774	***	a
														DASS15	<---	DASS8GeneralFactor	0.704	0.031	22.774	***	a
														DASS20	<---	DASS8GeneralFactor	0.704	0.031	22.774	***	a
														DASS8	<---	DASS8GeneralFactor	0.704	0.031	22.774	***	a
														DASS12	<---	DASS8GeneralFactor	0.704	0.031	22.774	***	a
			DASS-12
																Regression Weights: (Group number 1 - Default model)
																			Estimate	S.E.	C.R.	P	Label
																DASS2	<---	Anxiety	1
																DASS4	<---	Anxiety	1.148	0.085	13.556	***
																DASS7	<---	Anxiety	1.409	0.103	13.701	***
																DASS19	<---	Anxiety	0.868	0.074	11.767	***
																DASS3	<---	Depression	1
																DASS10	<---	Depression	0.81	0.099	8.175	***
																DASS13	<---	Depression	0.173	0.099	1.75	0.08
																DASS17	<---	Depression	1.218	0.124	9.818	***
																DASS1	<---	Stress	1
																DASS11	<---	Stress	-0.087	0.105	-0.827	0.408
																DASS12	<---	Stress	0.11	0.095	1.164	0.244
																DASS18	<---	Stress	0.372	0.086	4.333	***
																DASS3	<---	DASS12Total	0.716	0.024	29.628	***	a
																DASS10	<---	DASS12Total	0.716	0.024	29.628	***	a
Supplementary Figure 2+A101. Bifactor structure of the DASS-12																DASS13	<---	DASS12Total	0.716	0.024	29.628	***	a
																DASS17	<---	DASS12Total	0.716	0.024	29.628	***	a
																DASS2	<---	DASS12Total	0.716	0.024	29.628	***	a
																DASS4	<---	DASS12Total	0.716	0.024	29.628	***	a
																DASS7	<---	DASS12Total	0.716	0.024	29.628	***	a
																DASS19	<---	DASS12Total	0.716	0.024	29.628	***	a
																DASS1	<---	DASS12Total	0.716	0.024	29.628	***	a
																DASS11	<---	DASS12Total	0.716	0.024	29.628	***	a
																DASS12	<---	DASS12Total	0.716	0.024	29.628	***	a
																DASS18	<---	DASS12Total	0.716	0.024	29.628	***	a
DASS-21
																Regression Weights: (Group number 1 - Default model)
																			Estimate	S.E.	C.R.	P	Label
																DASS2	<---	Anxiety	1
																DASS4	<---	Anxiety	1.175	0.093	12.602	***
																DASS7	<---	Anxiety	1.569	0.117	13.457	***
																DASS9	<---	Anxiety	1.458	0.107	13.571	***
																DASS15	<---	Anxiety	1.094	0.087	12.631	***
																DASS19	<---	Anxiety	0.955	0.082	11.604	***
																DASS20	<---	Anxiety	1.094	0.088	12.362	***
																DASS3	<---	Depression	1
																DASS5	<---	Depression	1.315	0.137	9.635	***
																DASS10	<---	Depression	1.055	0.118	8.925	***
																DASS13	<---	Depression	0.202	0.096	2.108	0.035
																DASS16	<---	Depression	1.02	0.116	8.794	***
																DASS17	<---	Depression	1.63	0.167	9.769	***
																DASS21	<---	Depression	1.399	0.145	9.66	***
																DASS1	<---	Stress	1
																DASS6	<---	Stress	0.991	0.088	11.209	***
																DASS8	<---	Stress	0.668	0.078	8.579	***
																DASS11	<---	Stress	-0.055	0.09	-0.613	0.54
																DASS12	<---	Stress	0.106	0.084	1.269	0.204
																DASS14	<---	Stress	0.642	0.078	8.272	***
																DASS18	<---	Stress	0.419	0.076	5.537	***
																DASS3	<---	Distress	0.723	0.024	30.192	***	a
																DASS5	<---	Distress	0.723	0.024	30.192	***	a
																DASS10	<---	Distress	0.723	0.024	30.192	***	a
																DASS13	<---	Distress	0.723	0.024	30.192	***	a
Supplementary Figure 3. Bifactor structure of the DASS-21																DASS16	<---	Distress	0.723	0.024	30.192	***	a
																DASS17	<---	Distress	0.723	0.024	30.192	***	a
																DASS21	<---	Distress	0.723	0.024	30.192	***	a
																DASS2	<---	Distress	0.723	0.024	30.192	***	a
																DASS4	<---	Distress	0.723	0.024	30.192	***	a
																DASS7	<---	Distress	0.723	0.024	30.192	***	a
																DASS9	<---	Distress	0.723	0.024	30.192	***	a
																DASS15	<---	Distress	0.723	0.024	30.192	***	a
																DASS19	<---	Distress	0.728	0.037	19.914	***
																DASS20	<---	Distress	0.723	0.024	30.192	***	a
																DASS1	<---	Distress	0.723	0.024	30.192	***	a
																DASS6	<---	Distress	0.723	0.024	30.192	***	a
																DASS8	<---	Distress	0.723	0.024	30.192	***	a
																DASS11	<---	Distress	0.723	0.024	30.192	***	a
																DASS12	<---	Distress	0.723	0.024	30.192	***	a
																DASS14	<---	Distress	0.723	0.024	30.192	***	a
																DASS18	<---	Distress	0.723	0.024	30.192	***	a

## Sheet: Known-group validity
Mann-Whitney Test
Ranks
illnessrec		N	Mean Rank	Sum of Ranks
DASSDep	Alzheimer	316	288.555	91183.5
	Non Alzheimer	255	282.833	72122.5
	Total	571
DASSAnx	Alzheimer	316	289.413	91454.5
	Non Alzheimer	255	281.771	71851.5
	Total	571
DASSStress	Alzheimer	316	290.902	91925
	Non Alzheimer	255	279.925	71381
	Total	571
TotalDASS21	Alzheimer	316	289.266	91408
	Non Alzheimer	255	281.953	71898
	Total	571
DASS12_Depression	Alzheimer	316	290.782	91887
	Non Alzheimer	255	280.075	71419
	Total	571
DASS12_Anxiety	Alzheimer	316	290.834	91903.5
	Non Alzheimer	255	280.01	71402.5
	Total	571
DASS12_Stress	Alzheimer	316	291.199	92019
	Non Alzheimer	255	279.557	71287
	Total	571
DASS_12	Alzheimer	316	290.97	91946.5
	Non Alzheimer	255	279.841	71359.5
	Total	571
DASS8_Depression	Alzheimer	316	289.103	91356.5
	Non Alzheimer	255	282.155	71949.5
	Total	571
DASS8_Anxiety	Alzheimer	316	286.581	90559.5
	Non Alzheimer	255	285.28	72746.5
	Total	571
DASS8_Stress	Alzheimer	316	291.956	92258
	Non Alzheimer	255	278.62	71048
	Total	571
DASS_8	Alzheimer	316	289.133	91366
	Non Alzheimer	255	282.118	71940
	Total	571
Test Statisticsa
	DASSDep	DASSAnx	DASSStress	TotalDASS21	DASS12_Depression	DASS12_Anxiety	DASS12_Stress	DASS_12	DASS8_Depression	DASS8_Anxiety	DASS8_Stress	DASS_8
Mann-Whitney U	39482.5	39211.5	38741	39258	38779	38762.5	38647	38719.5	39309.5	40106.5	38408	39300
Wilcoxon W	72122.5	71851.5	71381	71898	71419	71402.5	71287	71359.5	71949.5	72746.5	71048	71940
Z	-0.412619	-0.551098	-0.79179	-0.52669	-0.773895	-0.782107	-0.842903	-0.801768	-0.503714	-0.0942297	-0.975679	-0.505723
Asymp. Sig. (2-tailed)	0.679886	0.581566	0.428483	0.598409	0.438993	0.434151	0.399283	0.422687	0.614462	0.924927	0.329223	0.613051
a. Grouping Variable: illnessrec
Mann-Whitney Test
Ranks
help_caregiver		N	Mean Rank	Sum of Ranks
DASSDep	No	236	329.28	77710
	Yes	335	255.51	85596
	Total	571
DASSAnx	No	236	332.104	78376.5
	Yes	335	253.521	84929.5
	Total	571
DASSStress	No	236	327.581	77309
	Yes	335	256.707	85997
	Total	571
TotalDASS21	No	236	331.907	78330
	Yes	335	253.66	84976
	Total	571
DASS12_Depression	No	236	329.104	77668.5
	Yes	335	255.634	85637.5
	Total	571
DASS12_Anxiety	No	236	331.93	78335.5
	Yes	335	253.643	84970.5
	Total	571
DASS12_Stress	No	236	324.199	76511
	Yes	335	259.09	86795
	Total	571
DASS_12	No	236	332.254	78412
	Yes	335	253.415	84894
	Total	571
DASS8_Depression	No	236	326.068	76952
	Yes	335	257.773	86354
	Total	571
DASS8_Anxiety	No	236	329.708	77811
	Yes	335	255.209	85495
	Total	571
DASS8_Stress	No	236	317.833	75008.5
	Yes	335	263.575	88297.5
	Total	571
DASS_8	No	236	329.229	77698
	Yes	335	255.546	85608
	Total	571
Test Statisticsa
	DASSDep	DASSAnx	DASSStress	TotalDASS21	DASS12_Depression	DASS12_Anxiety	DASS12_Stress	DASS_12	DASS8_Depression	DASS8_Anxiety	DASS8_Stress	DASS_8
Mann-Whitney U	29316	28649.5	29717	28696	29357.5	28690.5	30515	28614	30074	29215	32017.5	29328
Wilcoxon W	85596	84929.5	85997	84976	85637.5	84970.5	86795	84894	86354	85495	88297.5	85608
Z	-5.26911	-5.61297	-5.06402	-5.58212	-5.25993	-5.60312	-4.66918	-5.62613	-4.90433	-5.34757	-3.93194	-5.26136
Asymp. Sig. (2-tailed)	1.37086e-07	1.98881e-08	4.10505e-07	2.37604e-08	1.44107e-07	2.10531e-08	3.02398e-06	1.84299e-08	9.37489e-07	8.91446e-08	8.42621e-05	1.42994e-07
a. Grouping Variable: help_caregiver
Mann-Whitney Test
Ranks
autonomy_basic_function		N	Mean Rank	Sum of Ranks
DASSDep	Not autonomous	455	296.507	134910
	Yes	116	244.789	28395.5
	Total	571
DASSAnx	Not autonomous	455	299.27	136168
	Yes	116	233.948	27138
	Total	571
DASSStress	Not autonomous	455	297.251	135249
	Yes	116	241.871	28057
	Total	571
TotalDASS21	Not autonomous	455	298.73	135922
	Yes	116	236.069	27384
	Total	571
DASS12_Depression	Not autonomous	455	296.125	134737
	Yes	116	246.284	28569
	Total	571
DASS12_Anxiety	Not autonomous	455	298.914	136006
	Yes	116	235.345	27300
	Total	571
DASS12_Stress	Not autonomous	455	296.363	134845
	Yes	116	245.353	28461
	Total	571
DASS_12	Not autonomous	455	298.209	135685
	Yes	116	238.112	27621
	Total	571
DASS8_Depression	Not autonomous	455	295.195	134314
	Yes	116	249.935	28992.5
	Total	571
DASS8_Anxiety	Not autonomous	455	298.665	135892
	Yes	116	236.323	27413.5
	Total	571
DASS8_Stress	Not autonomous	455	296.434	134878
	Yes	116	245.073	28428.5
	Total	571
DASS_8	Not autonomous	455	298.385	135765
	Yes	116	237.422	27541
	Total	571
Test Statisticsa
	DASSDep	DASSAnx	DASSStress	TotalDASS21	DASS12_Depression	DASS12_Anxiety	DASS12_Stress	DASS_12	DASS8_Depression	DASS8_Anxiety	DASS8_Stress	DASS_8
Mann-Whitney U	21609.5	20352	21271	20598	21783	20514	21675	20835	22206.5	20627.5	21642.5	20755
Wilcoxon W	28395.5	27138	28057	27384	28569	27300	28461	27621	28992.5	27413.5	28428.5	27541
Z	-3.01827	-3.81225	-3.23313	-3.65244	-2.91551	-3.71746	-2.98883	-3.50408	-2.65556	-3.6563	-3.0411	-3.55673
Asymp. Sig. (2-tailed)	0.0025422	0.00013771	0.00122444	0.000259764	0.00355108	0.000201238	0.00280051	0.000458189	0.0079178	0.000255884	0.00235712	0.000375507
a. Grouping Variable: autonomy_basic_function
Mann-Whitney Test
Ranks
relationship_rec		N	Mean Rank	Sum of Ranks
DASSDep	Children	410	253.55	103956
	Spouses	118	302.547	35700.5
	Total	528
DASSAnx	Children	410	251.174	102982
	Spouses	118	310.801	36674.5
	Total	528
DASSStress	Children	410	254.171	104210
	Spouses	118	300.39	35446
	Total	528
TotalDASS21	Children	410	251.83	103250
	Spouses	118	308.521	36405.5
	Total	528
DASS12_Depression	Children	410	252.888	103684
	Spouses	118	304.847	35972
	Total	528
DASS12_Anxiety	Children	410	250.91	102873
	Spouses	118	311.72	36783
	Total	528
DASS12_Stress	Children	410	255.494	104752
	Spouses	118	295.792	34903.5
	Total	528
DASS_12	Children	410	251.616	103162
	Spouses	118	309.267	36493.5
	Total	528
DASS8_Depression	Children	410	253.27	103840
	Spouses	118	303.521	35815.5
	Total	528
DASS8_Anxiety	Children	410	252.813	103654
	Spouses	118	305.106	36002.5
	Total	528
DASS8_Stress	Children	410	257.577	105606
	Spouses	118	288.555	34049.5
	Total	528
DASS_8	Children	410	252.635	103580
	Spouses	118	305.725	36075.5
	Total	528
Test Statisticsa
	DASSDep	DASSAnx	DASSStress	TotalDASS21	DASS12_Depression	DASS12_Anxiety	DASS12_Stress	DASS_12	DASS8_Depression	DASS8_Anxiety	DASS8_Stress	DASS_8
Mann-Whitney U	19700.5	18726.5	19955	18995.5	19429	18618	20497.5	18907.5	19585.5	19398.5	21351.5	19325.5
Wilcoxon W	103956	102982	104210	103250	103684	102873	104752	103162	103840	103654	105606	103580
Z	-3.0788	-3.74627	-2.90536	-3.55772	-3.27271	-3.82838	-2.54271	-3.61914	-3.17525	-3.30116	-1.97609	-3.33494
Asymp. Sig. (2-tailed)	0.00207834	0.000179481	0.00366834	0.000374094	0.00106521	0.000128988	0.0109995	0.000295583	0.0014971	0.000962851	0.0481448	0.000853184
a. Grouping Variable: relationship_rec
Mann-Whitney Test
Ranks
gender		N	Mean Rank	Sum of Ranks
DASSDep	Female	466	271.292	126422
	Male	104	349.163	36313
	Total	570
DASSAnx	Female	466	267.553	124680
	Male	104	365.918	38055.5
	Total	570
DASSStress	Female	466	271.549	126542
	Male	104	348.01	36193
	Total	570
TotalDASS21	Female	466	268.897	125306
	Male	104	359.894	37429
	Total	570
DASS12_Depression	Female	466	270.54	126072
	Male	104	352.534	36663.5
	Total	570
DASS12_Anxiety	Female	466	267.508	124658
	Male	104	366.12	38076.5
	Total	570
DASS12_Stress	Female	466	274.535	127934
	Male	104	334.63	34801.5
	Total	570
DASS_12	Female	466	268.806	125264
	Male	104	360.303	37471.5
	Total	570
DASS8_Depression	Female	466	274.77	128043
	Male	104	333.577	34692
	Total	570
DASS8_Anxiety	Female	466	268.55	125144
	Male	104	361.447	37590.5
	Total	570
DASS8_Stress	Female	466	274.627	127976
	Male	104	334.221	34759
	Total	570
DASS_8	Female	466	270.556	126079
	Male	104	352.462	36656
	Total	570
Test Statisticsa
	DASSDep	DASSAnx	DASSStress	TotalDASS21	DASS12_Depression	DASS12_Anxiety	DASS12_Stress	DASS_12	DASS8_Depression	DASS8_Anxiety	DASS8_Stress	DASS_8
Mann-Whitney U	17611	15868.5	17731	16495	17260.5	15847.5	19122.5	16452.5	19232	16333.5	19165	17268
Wilcoxon W	126422	124680	126542	125306	126072	124658	127934	125264	128043	125144	127976	126079
Z	-4.3663	-5.51547	-4.2887	-5.09603	-4.60821	-5.54048	-3.38308	-5.12563	-3.31509	-5.23462	-3.39027	-4.59114
Asymp. Sig. (2-tailed)	1.26366e-05	3.47842e-08	1.79722e-05	3.46852e-07	4.06156e-06	3.01646e-08	0.000716766	2.96549e-07	0.000916147	1.65324e-07	0.000698231	4.40828e-06
a. Grouping Variable: gender

## Sheet: DASS-8 discriminant validity
Supplementary Table 10. Implied (for all variables of the DASS-8) Correlations (Group number 1 - Default model)									DASS-8
	DASS12	DASS8	DASS20	DASS15	DASS9	DASS16	DASS13	DASS10
DASS12									Monotrait correlations
DASS8	0.626								S	0.528
DASS20	0.575	0.631							A	0.76
DASS15	0.598	0.657	0.767						D	0.659667
DASS9	0.578	0.635	0.741	0.772
DASS16	0.585	0.642	0.637	0.664	0.641				Heterotrait correlations
DASS13	0.657	0.6	0.595	0.62	0.599	0.649			S-A	0.612333
DASS10	0.579	0.636	0.631	0.657	0.635	0.688	0.642		S-D	0.6165
									A-D	0.631
													Supplementary Table 11. HTMT ratio of correlations for the DASS-8
									HTMT ratio					S	A	D
									S-A	0.966639			S
									S-D	1.04461			A	0.97
									A-D	0.891169			D	1.04	0.89

## Sheet: DASS-12 discriminant validity
Supplementary Table 12. Implied (for all variables of the DASS-12) Correlations (Group number 1 - Default model)													DASS-12
	DASS18	DASS12	DASS11	DASS1	DASS19	DASS7	DASS4	DASS2	DASS17	DASS13	DASS10	DASS3
DASS18													Monotrait correlations
DASS12	0.586												S	0.606833
DASS11	0.578	0.695											A	0.696333
DASS1	0.63	0.58	0.572										D	0.623333
DASS19	0.591	0.545	0.537	0.585
DASS7	0.613	0.564	0.556	0.664	0.712								Heterotrait correlations
DASS4	0.618	0.569	0.56	0.611	0.718	0.744							S-A	0.57525
DASS2	0.56	0.516	0.508	0.607	0.651	0.674	0.679						S-D	0.607875
DASS17	0.627	0.578	0.569	0.621	0.618	0.64	0.646	0.585					A-D	0.614875
DASS13	0.583	0.656	0.675	0.577	0.575	0.595	0.6	0.544	0.594
DASS10	0.618	0.57	0.561	0.612	0.61	0.632	0.637	0.577	0.63	0.586			HTMT ratio			Supplementary Table 13. HTMT ratio of correlations for the DASS-12
DASS3	0.649	0.598	0.589	0.643	0.641	0.663	0.669	0.606	0.662	0.615	0.653		S-A	0.884939			S	A	D
													S-D	0.98837		S
													A-D	0.933293		A	0.88
																D	0.99	0.93

## Sheet: DASS-21 discriminant validity
Supplementary Table 14. Implied (for all variables) Correlations (Group number 1 - Default model)																						DASS-21
	DASS18	DASS14	DASS12	DASS11	DASS8	DASS6	DASS1	DASS20	DASS19	DASS15	DASS9	DASS7	DASS4	DASS2	DASS21	DASS17	DASS16	DASS13	DASS10	DASS5	DASS3
DASS18																						Monotrait correlations
DASS14	0.667																					S	0.625571
DASS12	0.583	0.607																				A	0.711524
DASS11	0.578	0.601	0.694																			D	0.711524
DASS8	0.652	0.678	0.593	0.587
DASS6	0.653	0.679	0.594	0.588	0.664																	Heterotrait correlations
DASS1	0.632	0.657	0.575	0.569	0.642	0.644																S-A	0.616082
DASS20	0.627	0.653	0.571	0.566	0.638	0.639	0.618															S-D	0.617531
DASS19	0.616	0.641	0.56	0.555	0.626	0.627	0.607	0.698														A-D	0.636959
DASS15	0.651	0.678	0.593	0.587	0.662	0.663	0.642	0.739	0.725
DASS9	0.659	0.686	0.6	0.594	0.671	0.672	0.65	0.748	0.734	0.776												HTMT ratio				Supplementary Table 15. HTMT ratio of correlations for the DASS-21
DASS7	0.648	0.675	0.59	0.584	0.659	0.66	0.639	0.735	0.722	0.763	0.773											S-A	0.923432				S	A	D
DASS4	0.625	0.651	0.569	0.563	0.636	0.637	0.616	0.709	0.696	0.736	0.745	0.733										S-D	0.925604			S
DASS2	0.565	0.588	0.514	0.509	0.575	0.576	0.557	0.641	0.629	0.665	0.674	0.662	0.639									A-D	0.895204			A	0.92
DASS21	0.633	0.659	0.576	0.571	0.644	0.645	0.624	0.647	0.635	0.671	0.68	0.668	0.645	0.583												D	0.93	0.9
DASS17	0.635	0.661	0.578	0.572	0.646	0.647	0.626	0.649	0.637	0.673	0.682	0.67	0.646	0.584	0.674
DASS16	0.63	0.655	0.573	0.567	0.64	0.641	0.621	0.643	0.631	0.668	0.676	0.665	0.641	0.58	0.668	0.67
DASS13	0.581	0.605	0.653	0.668	0.591	0.592	0.573	0.594	0.583	0.617	0.624	0.614	0.592	0.535	0.617	0.619	0.613
DASS10	0.627	0.653	0.571	0.565	0.638	0.639	0.618	0.641	0.629	0.665	0.673	0.662	0.638	0.577	0.665	0.667	0.662	0.611
DASS5	0.633	0.658	0.576	0.57	0.644	0.645	0.624	0.647	0.634	0.671	0.68	0.668	0.644	0.583	0.671	0.673	0.668	0.617	0.665
DASS3	0.624	0.65	0.568	0.563	0.635	0.636	0.615	0.638	0.626	0.662	0.67	0.659	0.636	0.575	0.662	0.664	0.659	0.608	0.656	0.662
